# Supplementary material
Source: ML conference proceedings conference paper supplement (https://aclanthology.org/P11-2057)
Supplement: Datasets [file Data_ALL.xls]

## Sheet: Sheet1
ID	Label	Proof	Most Common	1	2	3	4	5
11		A Soyuz capsule carrying a Russian cosmonaut, an American astronaut and U.S. billionaire tourist Charles Simonyi has docked at the international space station. Russian cosmonaut Gennady Padalka manually guided the capsule to a stop ahead of schedule Saturday two days after blasting off from the Baikonur cosmodrome in Kazakhstan. The crews of the capsule and the station will spend around three hou…
		"U.S. billionaire tourist Charles Simonyi.."
		"U.S." is a country	Geography	Geography	Geography	Geography	Geography	Geography
		"Russia" is a county	Geography	Geography	Geography	Geography	Geography	Geography
		People are of one country	Functionality	is member of	Functionality	Functionality	Functionality	is member of
	CONTRADICTION	Charles Simonyi is a Russian cosmonaut.
13		HONOLULU, Hawaii (CNN) — Battered by the current economic recession, Hawaii's economy could get a strong boost from two key sporting events. The National Football League's Pro Bowl Game will return to Honolulu in 2011 — an event that is expected to bring millions of dollars in revenue. Honolulu Mayor Mufi Hannemann is also hoping to lure the 31st Summer Olympic Games — but not to his city. He's a…
		"Honolulu Mayor Mufi Hannemann.."
		People have one occupation	Functionality	Functionality	Functionality	Functionality	Functionality	Functionality
	CONTRADICTION	Mufi Hannemann is the coach of The National Football League.
14		Three major bombings in less than a week will be causing some anxiety among political leaders in Baghdad and Washington. Last Thursday 10 people were killed by a car bomb at a crowded cattle market in Babel province, south of Baghdad. On Sunday more than 30 died when a suicide bomber riding a motorbike blew himself up at a police academy in the capital. Tuesday's bombing in Abu Ghraib also killed…
		"10 people were killed by a car bomb in Babel province, south of Baghdad"
		"Baghdad" is in Iraq	Geography	Geography	Geography	Geography	Geography	Geography
		"more than 30 died when a suicide bomber blew himself up in Baghdad"
		"bombing in Abu Ghraib also killed and wounded a large number of people"
		"Abu Ghraib" is in Iraq	Geography	Geography	Geography	Geography	Geography	Geography
		10 people + more than 30 + (a large number) = more than 40 people	Arithmetic	Arithmetic	Arithmetic	Arithmetic	Arithmetic	Arithmetic
	ENTAILMENT	In less than a week there were 3 major bombings in Iraq, killing more than 40 people.
25		At least 14 people have been killed in a suicide bomb attack in southern Sri Lanka, police say. The telecoms minister was among about 35 people injured in the blast at the town of Akuressa, 160km (100 miles) south of the capital, Colombo. Government officials were attending a function at a mosque to celebrate an Islamic holiday at the time. The defence ministry said the blast was carried out by T…
		"14 people have been killed in a suicide bomb attack"
		"..35 people injured in the blast at the town of Akuressa"
		to be "killed" in a bomb attack, one must be hit	Precondition	Cause and Effect	Precondition	Precondition	Precondition	Cause and Effect
		to be "injured" in a bomb attack, one must be hit	Precondition	Cause and Effect	Precondition	Precondition	Precondition	Cause and Effect
		14 people + 35 people = 49 people	Arithmetic	Arithmetic	Arithmetic	Arithmetic	Arithmetic	Arithmetic
	ENTAILMENT	49 people were hit by a suicide bomber in Akuressa.
29		Bout - who is generally believed to be a model for the arms dealer portrayed by Nicolas Cage in the 2005 movie 'Lord of War' - has repeatedly denied any involvement in illicit activities. At a hearing earlier this month, he angrily accused the United States of framing him and pressuring Thailand to extradite him. He has long been linked to some of the world's most notorious conflicts, allegedly s…
		"..Liberian dictator.."
		"Liberia" is a country	Geography	Geography	Geography	Geography	Geography	Geography
		"..Libyan leader Colonel Gaddafi"
		"Libya" is a country	Geography	Geography	Geography	Geography	Geography	Geography
		People are of one country	Functionality	Prominent Relationship	Functionality	Functionality	Functionality	is member of
	CONTRADICTION	Gaddafi is the Liberian dictator.
30		A man has hijacked a passenger plane in the Jamaican resort of Montego Bay, and is still holding five crew members hostage, reports say. More than 150 passengers were on board when the man forced his way on board the Canada-bound charter plane but all have now been released. The man breached security and boarded as the plane was about to take off at around 2230 local time (0330 GMT). Negotiations…
		"A man has hijacked a passenger plane.."
		"plane" has passengers and crew	has parts	Synecdoche	has parts	has parts	has parts	has parts
		When plane is hijacked, passengers and crew are hostage	Simultaneous Conditions	Argument Types	Simultaneous Conditions	Simultaneous Conditions	Cause and Effect	Argument Types
		"all 150 passangers have now been released"
		passangers/hostages must be alive to be released	Precondition	Simultaneous Conditions	Precondition	Precondition	Precondition	Precondition
		When a plane crashes, passengers die	Cause and Effect	Cause and Effect	Cause and Effect	Simultaneous Conditions	Cause and Effect	Cause and Effect
	CONTRADICTION	A plane crashed in the Jamaican resort of Montego Bay.
38		The hurricane caused severe destruction across the entire Mississippi coast and into Alabama, as far as 100 miles (160 km) from the storm's center. Katrina was the eleventh tropical storm, fifth hurricane, third major hurricane, and second Category 5 hurricane of the 2005 Atlantic season. It formed over the Bahamas on August 23, 2005, and crossed southern Florida as a moderate Category 1 hurrican…
		"The hurricane formed over the Bahamas"
		"..before strengthening rapidly in the Gulf of Mexico"
		"the Bahamas" is a place	Geography	Geography	Geography	Geography	Geography	Geography
		A hurricane forms in one place	Functionality	Functionality	Functionality	Functionality	Functionality	Functionality
	CONTRADICTION	Hurricane Katrina formed in August 2005 in the Gulf of Mexico.
40		North Korea's rubber-stamp parliament has re-elected Kim Jong-il as chairman of the National Defence Commission, the country's most powerful position. Mr Kim's re-election comes days after a rocket launch that was lauded at home but criticised at the UN. Analysts say the move will help cement Mr Kim's position, after rumours he lost some of his grip on power after suffering a stroke in August. Ob…
		"Kim Jong-il as chairman of the National Defence Commission of North Korea"
		"North Korea's" leaders are not trusted by most countries	Public Entities	Public Entities	Support/Opposition	Cultural/Situational	Public Entities	Support/Opposition
		"UN" leaders are trusted by most countries	Public Entities	Public Entities	Support/Opposition	Cultural/Situational	Public Entities	Support/Opposition
	CONTRADICTION	Kim Jong-il is the chairman of the UN.
41		Varun and his estranged cousins are the grandchildren of Indira Gandhi, the former prime minister who was assassinated in 1984. Her two sons - Rajiv Gandhi, who became premier after Indira's assassination and Sanjay Gandhi who died in an aircraft crash while doing aerobatics - married women with very different personalities. Varun's mother, Maneka, widow of Sanjay Gandhi, is headstrong, voluble, …
		"Indira Gandhi .. was assassinated"
		in an "assassination," a person is responsible for the death	Accountability	Argument Types	Accountability	Accountability	Accountability	Accountability
		sports can cause death	Cause and Effect	Accountability	Cause and Effect	Cause and Effect	Cause and Effect	Omniscience
		a person dies of one cause	Functionality	Functionality	Functionality	Functionality	Functionality	Cause and Effect
	CONTRADICTION	Indira Gandhi died doing aerobatics.
42		On a mundane morning in late summer in Paris, the impossible happened. The Mona Lisa vanished. On Sunday evening, August 20, 1911, Leonardo da Vinci's best-known painting was hanging in her usual place on the wall of the Salon Carré, between Correggio's Mystical Marriage and Titian's Allegory of Alfonso d'Avalos. On Tuesday morning, when the Louvre reopened to the public, she was gone. Within hou…
		"The Mona Lisa..,Leonardo da Vinci's painting.."
		people paint paintings	Argument Types	Prominent Relationship	Argument Types	Argument Types	Argument Types	Functionality
		when a "painting belongs to a person," it means the person painted said painting	Definition	Argument Types	Definition	Definition	Prominent Relationship	Definition
	ENTAILMENT	Leonardo da Vinci painted the Mona Lisa.
56		(CNN) — Nadya Suleman, the Southern California woman who gave birth to octuplets in January, has fired a nonprofit group of nurses charged with helping care for her children, CNN affiliate KTLA has reported. Suleman accused the nurses, from a group called Angels in Waiting, of spying on her to report her to child-welfare authorities, the affiliate reported Monday. The group was working for free, …
		"Nadya Suleman gave birth to octuplets"
		"octuplets" are 8 children	Definition	Definition	Definition	Definition	Definition	Arithmetic
		"..her six other children"
		8 children + 6 children = 14 children	Arithmetic	Arithmetic	Arithmetic	Arithmetic	Arithmetic	Arithmetic
	ENTAILMENT	Nadya Suleman has 14 children.
59		(CNN) — Numerous wildfires were roaring Thursday through parts of Oklahoma and Texas, engulfing one entire town and searing neighborhoods including one in Oklahoma City. Hurricane-force winds continued to kick the flames higher. The fires had engulfed so many miles of turf, and flying embers had sparked in so many different places, that hours after the first blazes were reported Thursday morning,…
		"wildfires were roaring through parts of Oklahoma..searing neighborhoods"
		"neighborhoods" occupy large spaces	Cultural/Situational	Cultural/Situational	Geography	Argument Types	Cultural/Situational	Omniscience
		"searing neighborhood" contributes to "vast damages"
		"The fires had engulfed so many miles of turf"
		"many miles" is "vast"	Cultural/Situational	Cultural/Situational	Cultural/Situational	Definition	Cultural/Situational	Definition
		"fires" cause "damages"	Cause and Effect	Cause and Effect	Cause and Effect	Cause and Effect	Cause and Effect	Cause and Effect
		"fires engulfing many miles of turf" contributes to "vast damages"
		"fires" were causing "vast damages"	Probabilistic Dependency	Accountability	Transitivity	Probabilistic Dependency	Probabilistic Dependency	Cause and Effect
		only one event causes damages	Functionality	Functionality	Functionality	Functionality	Functionality	Cause and Effect
	CONTRADICTION	A hurricane has caused vast damages in Oklahoma City.
69		The museum's co-curator, Yitzchak Mais, former director of the Yad Vashem museum in Jerusalem, explained its significance as filling a largely unexplored niche. "These are your neighbors from the Midwest," Mr. Mais said. "You'll realize that you walked on the street with them, shopped with them at the grocery, sat with them at the movie theater." "You've lived with the witnesses," he went on. "It…
		"the Yad Vashem museum in Jerusalem"
		"Jerusalem" is in Israel	Geography	Geography	Geography	Geography	Geography	Geography
	ENTAILMENT	The Yad Vashem Holocaust museum is located in Israel.
95		Dramatic footage obtained by the Guardian shows that the man who died at last week's G20 protests in London was attacked from behind and thrown to the ground by a baton-wielding police officer in riot gear. Moments after the assault on Ian Tomlinson was captured on video, he suffered a heart attack and died. The Guardian has handed a dossier of evidence to the police complaints watchdog. It sheds…
		"Ian Tomlinson was attacked by a police officer"
		police do not attack one another	Argument Types	Support/Opposition	Argument Types	Argument Types	Argument Types	Argument Types
	CONTRADICTION	Ian Tomlinson was a police officer.
98		Early iterations of the 3D Internet have been a hit. Virtual world Second Life, created by Linden Lab, hosts 1 million users a month, up from 544,313 a year ago. Cooliris makes software that lets users view photos, video, and Web pages in 3D. "We solve the problem of navigating large amounts of content," says co-founder Austin Shoemaker, 25, who is also among the Best Young Tech Entrepreneurs fin…
		"Second Life hosted 544,313 users a year ago"
		"544,313" is about 550,000	Arithmetic	Arithmetic	Arithmetic	Arithmetic	Arithmetic	Arithmetic
	ENTAILMENT	Last year there were about 550 thousands players on Second Life.
112		The same mindset that led to these over-the-top punishments was apparently at play in the strip search of a 13-year-old student by Safford, Ariz., school officials in 2003. They were trying to find out whether she had prescription-strength ibuprofen tablets — the equivalent of a couple of Advils hidden in her bra or panties, in violation of the "no drugs" policy. No pills were found. Savana Reddi…
		"the strip search of a 13-year-old student by school officials"
		"Savana Redding, now 19.."
		19 - 13 = 6	Arithmetic	Arithmetic	Arithmetic	Arithmetic	Arithmetic	Arithmetic
	ENTAILMENT	Savana Redding was strip-searched at school six years ago.
122		In a sense Italy has never lost the art of la dolce vita: that is why millions of tourists go there every year, to discover (or rediscover) the leisurely lunch and the contemplation of beauty. But Mr Petrini, who founded Slow Food in 1986 as a reaction to the arrival of McDonald's near the Spanish Steps in Rome, began his campaign out of fear that the Mediterranean way of life was being eroded by…
		"Petrini says that 'we are enslaved by speed'" means Petrini is against "speed"	Support/Opposition	Support/Opposition	Support/Opposition	Support/Opposition	Support/Opposition	Support/Opposition
		"Petrini says 'Fast Life is a virus'" means Petrini is against "Fast Life"	Support/Opposition	Support/Opposition	Support/Opposition	Support/Opposition	Support/Opposition	Support/Opposition
		"Fast Life" is related to Fast Food
		"speed" is related to Fast Food
		"Fast Life" and "speed" are related to Fast Food	Probabilistic Dependency	Probabilistic Dependency	Probabilistic Dependency	Probabilistic Dependency	Probabilistic Dependency	Omniscience
		"Petrini" is against Fast Food
		"founder of X" means person supports X	Support/Opposition	Support/Opposition	Definition	Support/Opposition	Support/Opposition	Support/Opposition
		"McDonald's" is Fast Food
	CONTRADICTION	Petrini is the founder of McDonalds.
142		Mr. Berlusconi promises to rebuild Onna again, as it was rebuilt after being overrun by the Nazis. Onna has become a symbol of the destruction wrought by the April 6 earthquake that killed 296 people in the central Abruzzo region. About 40 of Onna's 300 residents died. Mr. Berlusconi said on Saturday that Italians should remember with respect the partisans who fought Fascism but also those who di…
		"Onna's 300 residents"
		something that has residents is a settlement	Argument Types	Argument Types	Prominent Relationship	Argument Types	Definition	Argument Types
		a village is a settlement with a few hundred to a few thousand residents	Definition	has parts	Definition	Argument Types	Definition	Definition
		"Onna" is a village
		"Onna has become a symbol of the destruction wrought by the April 6 earthquake"
		To be labled as a "symbol of destruction," the thing must destroy or be destroyed	Precondition	Precondition	Precondition	Precondition	Precondition	Argument Types
		"Mr. Berlusconi promises to rebuild Onna"
		to "rebuild" something, it must have been destroyed	Precondition	Precondition	Precondition	Precondition	Precondition	Precondition
		"Mr. Berlusconi" is the prime minister of Italy	Public Entities	Public Entities	Public Entities	Public Entities	Public Entities	Public Entities
		The prime minister of a country represents that country	Synecdoche	Synecdoche	Synecdoche	Synecdoche	Synecdoche	Support/Opposition
		If a country builds a city, the city belongs to that country	Prominent Relationship	Argument Types	Geography	Prominent Relationship	Prominent Relationship	is member of
	ENTAILMENT	Onna is an Italian village destroyed by the earthquake in April.
158		This slight 93-year-old with white hair, who is now largely confined to a wheelchair, was formally recognised last week as one of the tiny handful of people to have survived not one but both of the American atomic bombs dropped on the Japanese cities of Hiroshima and Nagasaki in August 1945 - bringing to an end to World War II. Known in Japan as one of the hibakusha - literally 'the explosion aff…
		"..American atomic bombs dropped on the Japanese cities in 1945"
		"Americans" are people
		"Japan" is a place	Geography	Geography	Geography	Geography	Geography	Geography
		If a bomb belongs to people, the people are responsible for the bomb	Accountability	Accountability	Accountability	Accountability	Accountability	Accountability
	ENTAILMENT	Americans dropped nuclear bombs on Japan in 1945.
163		In 2007 the 550-seat double-decker A380 Airbus overtook the 747 as the largest passenger airliner in service, a development that some aviation experts saw as signalling the end of the 747. Dwindling 747 orders have cast a dark cloud over the future of the airliner. Most are now are freighters as traditionally loyal customers such as Qantas, Virgin Atlantic and Singapore Airlines turn to the A380.…
		"the 550-seat A380 Airbus"
		one seat holds one person	Functionality	Functionality	Functionality	Functionality	Definition	Prominent Relationship
	ENTAILMENT	Airbus A380 can carry 550 people.
165		Seven Democratic representatives traveled to Havana but an official communique read on the air said only six attended the meeting with Castro. The statement provided no details of what was discussed or how long the meeting lasted. It added that the group also spoke in recent days with the head of parliament and the country's foreign minister. The lawmakers came to talk about improving U.S.-Cuba r…
		"Washington's 47-year-old embargo against Cuba"
		"Washington" is the capital of the U.S.	Geography	is member of	Geography	Geography	Geography	Geography
		the capital of a country represents that country	Synecdoche	Synecdoche	Synecdoche	Synecdoche	Synecdoche	Synecdoche
	ENTAILMENT	The U.S. embargo on Cuba has been in place for 47 years.
168		As he campaigns for a third term, Mayor Michael R. Bloomberg is counting on his reputation as a top-notch manager who tamed a once-unruly metropolis. Yet to remarkable degree, the task of managing New York City over the last four years has fallen to Mr. Skyler, a lanky 35-year-old former Ivy League fencer and "Star Wars" buff who once tackled a mugger who was trying to steal a cellphone in Midtow…
		"Mayor Bloomberg campaignes for a third term"
		To campaign for nth term, one must have held n-1 terms	Precondition	Precondition	Precondition	Precondition	Precondition	Precondition
		3 - 1 = 2	Arithmetic	Arithmetic	Arithmetic	Arithmetic	Arithmetic	Arithmetic
		times as a politician is measured in "terms"	Definition	Definition	Definition	Definition	Definition	Arithmetic
	ENTAILMENT	Bloomberg has been mayor twice.
176		As Mel Gibson walked hand in hand with his new Russian girlfriend on the red carpet last night, a few new grey hairs were the only sign that he is a man about to lose $US500 million. The Australian actor - in the middle of what is expected to become one of the world's most expensive divorces - attended a movie premiere in Los Angeles with Russian songstress Oksana Grigorieva, the woman at the cen…
		"Mel Gibson.., the Australian actor"
		"Australia" is a place	Geography	Geography	Geography	Geography	Geography	Geography
	ENTAILMENT	Mel Gibson comes from Australia.
177		DOHA, Qatar (AP) — Casey Stoner led from start to finish to win the MotoGP season opener on Monday and complete a personal hat trick of victories in Qatar. The Ducati rider produced a near-perfect race under lights to win the 22-lap race with a time of 42 minutes, 53.984 seconds at the 5.38 kilometer (3.34 mile) Losail International Circuit. The 23-year-old Australian finished ahead of defending …
		In motorcycle sports, motorcycle manufacturers are teams	X	X	X	X	X	X
		"Yamaha rider Valentino Rossi crossed the finish line (in the MotoGP)"
		"Yamaha" is a manufacturer
		"Yamaha" is a team
		"Casy Stoner, ..the Ducati rider"
		"Ducati" is a team
		A rider belongs to only one team	Functionality	Functionality	Functionality	Functionality	Functionality	Mutual Exclusivity
	CONTRADICTION	Valentino Rossi is the Ducati rider in the MotoGP.
178		BOSTON — Derrick Rose, the baby-faced Chicago Bulls point guard, is similar to nearly every other N.B.A. player in that he talks with his agent, B. J. Armstrong, about everything from the meaningful to the mundane. Their relationship diverges only because they discuss not only signatures on endorsement deals but also signature plays. Once, Armstrong was also a baby-faced point guard for the Bulls…
		"Michael Jordan .. won three N.B.A. titles"
		"N.B.A." = National Basketball Association	Definition	Definition	Definition	Definition	Cultural/Situational	Definition
		To win a sports title, one must play the sport	Precondition	Precondition	Precondition	Precondition	Precondition	Precondition
	ENTAILMENT	Michael Jordan played basketball.
179		This gap in knowledge makes earthquake prediction a frustrating and chancy exercise, and complicates the effort to calculate the risk that a human construction like a water reservoir or a geothermal power plant could inadvertently set off a deadly quake. Last month, Giampaolo Giuliani, a technician who works on a neutrino experiment at the Gran Sasso National Laboratory in Italy, issued an urgent…
		"Giampaolo Giuliani, a technician in Italy.."
		A person only works in one place	Functionality	Functionality	Functionality	Functionality	Functionality	Functionality
	CONTRADICTION	Giampaolo Giuliani is a researcher at the Swiss Federal Institute of Technology in Zurich.
180		Afrol News, 24 March - The Swiss Foreign Minister Micheline Calmy-Rey has said the country's authorities will not apologise or compensate to the Libyan government over the arrest of the son of Libyan leader Muammar Gaddafi saying that police were not at fault when Hannibal Gaddafi and his wife were arrested. The Minister has outrightly rejected the notion of compensation to the government saying …
		"Swiss Foreign Minister Micheline Calmy-Rey.."
		only one person is the Swiss Foreign Minister	Functionality	Functionality	Functionality	Functionality	Functionality	Argument Types
	CONTRADICTION	Muammar Gaddafi is the Swiss Foreign Minister.
200		Barack Obama made history on 4 November 2008 when he defeated Republican rival John McCain to become the first black president of the United States. He had already broken new ground in his White House campaign, as the first black candidate to become the presidential choice of either major US party. To many people, Mr Obama seemed to come from nowhere. Although he had served in the Illinois state …
		"Barack Obama defeated Republican rival John McCain"
		"..the presidential choice of either major US party"
		One choice per party becomes the presidental candidate of that party	Functionality	Functionality	Cultural/Situational	Functionality	Functionality	is member of
		"Barack Obama was a candidate"
		"Barack Obama became president of the United States"
	CONTRADICTION	Barack Obama was a Republican candidate for the US presidency.
207		The explosion happened at about 9:45pm local time, at the 'Rizk Plaza' shopping mall. It is understood from local media that a bomb was placed in the underground parking area below the complex, although there has been no official confirmation from security services. Sources on the ground say that the actual commercial center occupied the ground floor, with upper stories occupied by inhabited apar…
		"Broummana is about half-hour's drive from Beirut"
		"half-hour's drive" is near	Cultural/Situational	Cultural/Situational	Cultural/Situational	Definition	Cultural/Situational	Cultural/Situational
	ENTAILMENT	Beirut is near Broummana.
208		Fitzpatrick (42), of Larkfield Close, Lucan, Co Dublin, pleaded guilty to fraud and making a false report to gardai at his store on June 13, 2007, at the Dublin Circuit Criminal Court. Judge Martin Nolan called it a "case of desperation" and sentenced Fitzpatrick to two years, suspended for three years. Garda Claire O'Malley told the court she responded to a call from Mr Fitzpatrick and found him…
		"Fitzpatrick pleaded guilty to fraud and making a false report"
		If robbery were involved, it would have been mentioned	Omniscience	Omniscience	Omniscience	Omniscience	Omniscience	Omniscience
	CONTRADICTION	Fitzpatrick is accused of robbery.
216		Australia's emergency telephone service, triple-0, which is operated by Telstra, has been lost in Southern New South Wales and the Australian Capital Territory following damage to two optical fibre cables. It is believed that in two separate incidents, optical fibre cables were cut at Gundagai and Narrandera in Southern NSW. In addition to the loss of the triple-0 service, 34 mobile base stations…
		"Australia's emergency telephone service"
		"Australia" is a place	Geography	Geography	Geography	Geography	Geography	Geography
		"service has been lost in Southern New South Wales"
		"..Narrandera in Southern NSW"
		If a service belongs to a place, it is in that place	Prominent Relationship	Simultaneous Conditions	Functionality	Prominent Relationship	Geography	Prominent Relationship
	ENTAILMENT	Narrandera is situated in Australia.
220		Garnett scored 15 points in the fourth quarter, with 13 of those points coming in the final 6:20 of the period. "It's just about being a presence," Garnett said. "It's about making them have to deal with me. I will continue to take that approach." In addition to his 44-point night, Garnett helped his team by not turning the ball over at all during the game. Such a performance was not the case for…
		"Garnett scored points"
		to "score points," one must play	Precondition	Precondition	Precondition	Precondition	Precondition	Precondition
		A player belongs to one team	Functionality	Functionality	Functionality	Functionality	Functionality	Mutual Exclusivity
		More than one team is required to play	Precondition	Functionality	Functionality	Precondition	Precondition	Prominent Relationship
		"The Suns .. as a team"
		"..Garnett and the Timberwolves taking advantage of the Suns"
		In sports, either payers or teams take advantage of teams	Functionality	Probabilistic Dependency	Functionality	Simultaneous Conditions	Argument Types	Functionality
		"the Timberwolves" is not a player, so it must be a team
	ENTAILMENT	Garnett plays for the Timberwolves.
224		Secretary of State of the Vatican City, Cardinal Tarcisio said that the Pope apologized for the way his remarks made during a speech at the University of Regensburg in Germany on September 12 2006 were interpreted saying, "the Holy Father is very sorry that some passages of his speech may have appeared offensive to Muslims and were interpreted in a way he hadn't intended them to be. [The speech w…
		"Cardinal Tarcisio said that the Pope apologized"
		"Cardinal Tarcisio said 'the Holy Father is very sorry..'"
		to speak on behalf of someone, you must work with them	Precondition	Precondition	Precondition	Precondition	Precondition	Support/Opposition
		"Secretary of State of the Vatican City, Cardinal Tarcisio"
		"Secretary of State" is in the government	is member of	Definition	is member of	is member of	is member of	is member of
		The Pope works with the government of the Vatican	Public Entities	Probabilistic Dependency	Transitivity	Public Entities	Public Entities	Prominent Relationship
	ENTAILMENT	The Pope works with Cardinal Tarcisio.
227		On Thursday in Canada, the Society Promoting Environmental Conservation (SPEC) and the Western Canada Wilderness Committee delivered petitions with over 10,000 signatorys to the Premier of British Columbia's office. The petitions ask that the government cancel the Gateway Program's highway expansions components and invest more in transit instead. The Gateway Program is a transportation infrastruc…
		"the Society Promoting Environmental Conservation (SPEC) delivered petitions"
		"petitions" ask for something	Definition	Definition	Definition	Definition	Definition	Definition
		"The petitions ask that the government cancel the Gateway Program's highway expansions components"
		the SPEC asks to cancel Gateway Program's highway expansions components	Transitivity	Transitivity	Probabilistic Dependency	Argument Types	Transitivity	Probabilistic Dependency
		"to ask to cancel components of something" means one is against it	Support/Opposition	Support/Opposition	Support/Opposition	Support/Opposition	Support/Opposition	Support/Opposition
	ENTAILMENT	The Society Promoting Environmental Conservation is against the Gateway Program.
229		Akwasi Osei-Adjei is Ghana's foreign minister. He tells VOA reporter Peter Clottey that President Kufuor is concerned about the tensions in Kenya. "Basically, the president has been invited to Kenya to see for himself the situation and offer advise as to how the two leaders can come together to stop what is happening in Kenya. As you know, people are being killed and there are a lot of disturbanc…
		"..reporter Peter Clottey.."
		"reporter" is part of media sector	is member of	is member of	is member of	is member of	is member of	is member of
		"president" is part of government sector	is member of	is member of	is member of	is member of	is member of	is member of
		media and government sectors do not cross-employ	Mutual Exclusivity	Mutual Exclusivity	Mutual Exclusivity	Mutual Exclusivity	Mutual Exclusivity	Mutual Exclusivity
	CONTRADICTION	Peter Clottey is employed by President Kufuor.
	ENTAILMENT	Morris Iemma is the prime minister of New South Wales.
240		A lack of thorough and consistent measures to pick the White House press corps members has led many to question the reason a little-known conservative reporter had access to sensitive documents and the President of the United States. Jeff Gannon, whose real name is James Guckert, has been operating under an assumed name while attending White House press briefings. Gannon/Guckert was a reporter fo…
		"James Guckert was a reporter for Talon News"
		when a person is an employee of an organization, that organization pays their salary	Simultaneous Conditions	Prominent Relationship	Prominent Relationship	Simultaneous Conditions	Simultaneous Conditions	Support/Opposition
	ENTAILMENT	Talon News paid James Guckert's salary.
244		Nepal's 10-year civil war has come to a peaceful conclusion with the signing of a historic accord between Prime Minister Girija Prasad Koirala and Prachanda, leader of the Maoist rebel faction that had been fighting for political change. The deal was signed in Kathmandu on Tuesday. The deal would allow the Maoists into the Nepalese government, and place both Maoist and government weapons under UN…
		"Prime Minister Girija Prasad Koirala"
		"Prime Minister" is a government position	Definition	Definition	Definition	Definition	is member of	Definition
		a "rebel faction" is an illegitimate government body	Definition	Definition	Definition	Definition	is member of	Definition
		members of a government are not affiliated with illegitimate government bodies	Mutual Exclusivity	Mutual Exclusivity	Mutual Exclusivity	Mutual Exclusivity	Mutual Exclusivity	Mutual Exclusivity
	CONTRADICTION	Girija Prasad Koirala is the leader of a Maoist rebel faction.
248		Clarence Ray Allen, convicted of ordering a hit in 1980 that resulted in the deaths of the target and two bystanders, was executed just after his 76th birthday, making him the second-oldest man in U.S. history to be executed. He had been in prison for ordering the murder of his son's girlfriend when he ordered the hit that resulted in the death penalty conviction. However, appeals caused him to r…
		"Clarence Ray Allen was executed"
		In an execution, the person executed has no relation to the executioner	Cultural/Situational	Argument Types	Cultural/Situational	Prominent Relationship	Cultural/Situational	Omniscience
	CONTRADICTION	Clarence Ray Allen was killed by his girlfriend's son.
252		A bid made by Singapore Airlines for a 24% stake in China Eastern Airlines was turned down by minority shareholders. Talks about a sale started in March 2007 when Singapore Airlines and China Eastern started negotiations about a possible deal. According to Forbes the deal would have helped China Eastern's earnings and accelerate the consolidation and would have improved the market position of Chi…
		"A bid made by Singapore Airlines for a stake in China Eastern Airlines"
		to bid for a stake in something, one cannot own it	Precondition	Simultaneous Conditions	Precondition	Precondition	Precondition	Precondition
	CONTRADICTION	China Eastern Airlines is owned by Singapore Airlines.
263		Supermodel Naomi Campbells billionaire Russian boyfriend Vladislav Doronin is married, it has emerged. The catwalk queen and Doronin have been dating since last May, and the 46-year-old tycoon himself talked about buying her an engagement ring. However, Ekaterina, who claims to be his wife and the mother of his 12-year- old daughter, has told friends that she will not divorce her hubby. This is j…
		"Naomi Campbells boyfriend Vladislav Doronin"
		In order to have a boyfriend, one cannot be married to them	Precondition	Simultaneous Conditions	Precondition	Precondition	Precondition	Simultaneous Conditions
	CONTRADICTION	Naomi Campbell is married to Vladislav Doronin.
265		The magazine states that she has been on the set of the soap opera at CBS Television City since March 11. For a while, she didn't even tell her husband, former Guiding Light actor Michael Tylo, where she was really going. She told him that she was just going on "a lot of auditions," and that if she told sooner than she did, the news might slip out accidentally. Her husband currently teaches a cla…
		"she has been on the set at CBS Television City"
		"she didn't tell Michal Tylo where she was"
		"not telling someone something" implies they do not know that something	X	X	X	X	X	X
		If two people work at the same place, they cannot keep that from one another	X	X	X	X	X	X
	CONTRADICTION	Michael Tylo is an employee of CBS Television.
267		Over 2,000 NATO troops stood at attention at Kandahar Airfield Monday morning to mourn the death of the fifth Canadian soldier in a week to die in Afghanistan. Master Cpl. Raymond Arndt, a 32 year-old reservist from Peers, Alberta, was killed in a traffic accident August 5th when the G-Wagon he was travelling collided head-on with a civilian truck 35 kilometres southeast of Kandahar. The vehicle …
		If "Raymond Arndt" had killed the "three other soldiers," it would have been mentioned	Omniscience	Omniscience	Omniscience	Omniscience	Omniscience	Omniscience
	CONTRADICTION	Raymond Arndt is the killer of three other soldiers.
277		The Russian space agency has ordered design work to start for a next-generation spaceship capable of flying missions to the moon, setting the ground for a potential new space race with the United States. The space agency granted the state-controlled RKK Energiya company a US$23 million contract for initial work on a new, reusable craft to replace the 40-year-old Soyuz. The as-yet-unnamed Russian …
		"NASA's prospective Orion spacecraft"
		NASA is a U.S. space agency	Definition	Definition	Definition	Public Entities	Definition	is member of
		if a spacecraft belongs to an agency, it is produced by that agency	Prominent Relationship	Argument Types	Functionality	Prominent Relationship	Prominent Relationship	Functionality
		a spacecraft is produced by only one agency	Functionality	Functionality	Functionality	Functionality	Functionality	Mutual Exclusivity
	CONTRADICTION	Orion is produced by the Russian space agency.
278		Thousands of residents are evacuating coastal areas of far north Queensland (QLD), set to be lashed by Cyclone Larry tomorrow morning. The Australian Bureau of Meteorology warns that the "very destructive core of Severe Tropical Cyclone Larry, with extreme gusts up to 280 km/hr (174 mph) should cross the coast between 7 a.m. and 9 a.m. AEST on Monday (Sunday, 2100 to 2300 UTC). Destructive winds …
		"The Australian Bureau of Meteorology warns.."
		"Australia" is a place	Geography	Geography	Geography	Geography	Geography	Geography
		"winds are expected along the coast between Port Douglas.."
		"Port Douglas" is in Australia	Geography	Geography	Geography	Geography	Geography	is member of
	ENTAILMENT	Port Douglas is located in Australia.
281		Pop music producer Phil Spector, who produced a large number of hit records in the 1960s and 1970s, has been convicted of second-degree murder in the 2003 shooting of actress Lana Clarkson at the L.A. Superior Court in Los Angeles, California. Spector, currently 68, faces a minimum of 18 years in prison. Clarkson died February 3, 2003 at Spector's mansion, the "Pyrenees Castle", in Alhambra, Cali…
		"Phil Spector faces prison"
		To face prison, one must be alive	Precondition	Precondition	Precondition	Precondition	Precondition	Precondition
		if one person kills another person, that other person is dead	Cause and Effect	Cause and Effect	Cause and Effect	Prominent Relationship	Definition	Cause and Effect
	CONTRADICTION	Actress Lana Clarkson killed music producer Phil Spector.
284		A stadium disaster has claimed well over a dozen lives in the Ivory Coast. A crush, which may have occured after a wall collapse, took place today at the Félix Houphouët-Boigny Stadium in Abidjan and according to interior minister Desire Tagro killed 22 people and wounded 132 others.
		"interior minister Desire Tagro"
		"interior minister" is part of the government	is member of	is member of	is member of	is member of	is member of	is member of
		government is in the public sector	is member of	is member of	is member of	is member of	is member of	is member of
		"Stadium" is part of the private sector	is member of	is member of	is member of	is member of	is member of	is member of
		public and private sectors do not cross-employ	Mutual Exclusivity	Mutual Exclusivity	Mutual Exclusivity	Mutual Exclusivity	Mutual Exclusivity	Mutual Exclusivity
	CONTRADICTION	Desire Tagro is employed at the Félix Houphouët-Boigny Stadium.
292		Dr. Roger Vickers team used radar to locate three chambers within the rocky hill atop of which is the Temple of Taposiris Magna dedicated to the goddess Isis. The temple was constructed about 300 BC by Ptolemy II. The Supreme Council of Antiquities (SCA) expedition led by Hawass has yet to excavate the burial chambers 40 feet (12 meters) underground where they hope to find a crown or Egyptian hie…
		"Temple of Taposiris Magna dedicated to the goddess Isis"
		a building is only dedicated to one entity	Functionality	Functionality	Functionality	Functionality	Functionality	Support/Opposition
	CONTRADICTION	Temple of Taposiris Magna is dedicated to Ptolemy II.
302		Barack Obama is due to end his first overseas trip as US President today. Mr Obama has attended a series of engagements in Europe over the past week, including the G20 summit in London, a NATO meeting in Strasbourg and a conference of EU leaders in Prague. He is currently in Turkey, where he has been seeking to reach out a hand to the Islamic world. Mr Obama is due to head back to the US this aft…
		"Barack Obama,..US President"
		"President" is part of government	is member of	is member of	is member of	is member of	is member of	is member of
		"EU" is a government body	Definition	Definition	Definition	Public Entities	is member of	Public Entities
		U.S. and E.U. are exclusive government bodies	Mutual Exclusivity	Mutual Exclusivity	Mutual Exclusivity	Argument Types	Mutual Exclusivity	Mutual Exclusivity
		A person is a leader in only one exclusive government body	Functionality	Functionality	Functionality	Functionality	Functionality	Functionality
	CONTRADICTION	Barack Obama is an EU leader.
309		The wife and children of Abdel Baset Ali al-Megrahi, a Libyan man convicted of the bombing of Pan Am Flight 103, were amongst other relatives and friends of prisoners protesting against alleged miscarriages of justice in Edinburgh yesterday. The airliner came down over Lockerbie, Scotland in December 1988, killing 270 people. Megrahi is due an appeal against his conviction next year. Also present…
		"Robert McTaggart ran Jason MacIntyre down in a van"
		as a result of the above, "Jason MacIntyre was killed"
		"Robert McTaggart" is responsible for killing "Jason MacIntye"	Accountability	Accountability	Accountability	Accountability	Accountability	Accountability
	ENTAILMENT	Robert McTaggart killed Jason MacIntyre.
314		On October 14, 2008, Canadians will be heading to the polls for the federal election. Christian Heritage Party candidate Ron Gray is standing for election in the riding of Langley. Wikinews contacted Ron Gray, to talk about the issues facing Canadians, and what they and their party would do to address them. Wikinews is in the process of contacting every candidate, in every riding across the count…
		"Christian Heritage Party candidate Ron Gray"
		a candidate from a party is supported by that party	Support/Opposition	Support/Opposition	Support/Opposition	Prominent Relationship	Support/Opposition	Support/Opposition
	ENTAILMENT	The Christian Heritage Party supports Ron Gray's candidacy.
315		The upcoming 2006 Brampton municipal election, to be held November 13, features an array of candidates looking to represent their wards in city council or the council of the Peel Region. Wikinews contributor Nick Moreau contacted many of the candidates, including Mathew Njenga, asking them to answer common questions sent in an email. This ward's incumbent is John A. Hutton; also challenging Hutto…
		"The Brampton municipal election"
		"Bramption" is a place	Geography	Geography	Geography	Geography	Geography	Geography
		To be a candidate of an election in a place, one must live in that place	Precondition	Simultaneous Conditions	Precondition	Precondition	Precondition	is member of
		"This ward's incumbent is John A. Hutton; also challenging Hutton is Joyce Rodriguez"
		challengers to incumbant are also candidates	Definition	Definition	Prominent Relationship	Argument Types	Definition	is member of
	ENTAILMENT	Joyce Rodriguez is a resident of Brampton.
317		The seemingly eternal flame of the American soap opera Guiding Light has been extinguished. CBS, the network which airs the serial drama in the United States, has announced its cancellation after 72 years. Guiding Light, which entered the Guinness Book of World Records as the longest-running dramatic series in the world, started on radio in 1937 as a series of stories about faith, in which charac…
		"CBS, the network which airs the serial drama in the United States"
		a network of a certain country means it airs shows in that country	Prominent Relationship	Probabilistic Dependency	Prominent Relationship	Definition	Prominent Relationship	Prominent Relationship
		"The show has been produced on television"
		a network that airs shows produced on television is a TV network	Prominent Relationship	Argument Types	Prominent Relationship	Argument Types	Definition	Prominent Relationship
	ENTAILMENT	CBS is an American TV network.
319		Miriam Stucky' is running for the Green Party of Ontario in the Ontario provincial election, in the Peterborough riding. Wikinews' Nick Moreau interviewed her regarding her values, her experience, and her campaign. Stay tuned for further interviews; every candidate from every party is eligible, and will be contacted. Expect interviews from Liberals, Progressive Conservatives, New Democratic Party…
		"Miriam Stucky' is running for the Green Party of Ontario"
		to run for a party, one must be a member of that party	Precondition	Simultaneous Conditions	Precondition	Precondition	Precondition	Precondition
	ENTAILMENT	Miriam Stucky is a member of the Green Party of Ontario.
329		The pilot who stole a light aircraft yesterday from Canada and landed in the central United States is now in custody. Adam Dylan Leon, a 31-year-old Canadian citizen, stole a Cessna 172 Skyhawk light aircraft from an airfield in Thunder Bay, Ontario, Canada. After taking off, the airplane went off course toward the United States. The State Capitol in Madison, Wisconsin was briefly evacuated, but …
		"Adam Dylan Leon stole a Cessna 172 Skyhawk light aircraft"
		When one is stealing an object, one does not own that object	Precondition	Prominent Relationship	Precondition	Simultaneous Conditions	Precondition	Precondition
	CONTRADICTION	Adam Dylan Leon is the owner of a Cessna 172 Skyhawk light aircraft.
334		Stock markets around the world, particularly those in the United Kingdom, have increased dramatically today. This is due to the ongoing events in the financial world, including the United States government's announcement that it would buy billions of dollars of bad loans from US banks. The primary UK index, the FTSE 100, rose in value by 8.04%, which is 392.50 points, to above the 5000 mark at 52…
		"The NASDAQ index has risen to 2248.63"
		"2248.63" is greater than 2000	Arithmetic	Arithmetic	Arithmetic	Arithmetic	Arithmetic	Arithmetic
	ENTAILMENT	The NASDAQ index has risen to above the 2000 mark.
336		Toronto - Nearly a million commuters were immobilized and some businesses closed as Toronto Transit Commission workers walked off the job yesterday and formed picket lines outside subway stations, bus terminals and other TTC facilities. None of their buses, streetcars or subway trains were operational. Some service in the Greater Toronto Area continued through other transit services, but was of l…
		"Toronto Mayor David Miller"
		a "mayor" is employed by a city	X	X	X	X	X	X
		a person is only employed by one entity	Functionality	Functionality	Functionality	Functionality	Functionality	Mutual Exclusivity
	CONTRADICTION	David Miller is an employee of the Toronto Transit Commission.
341		Over 1,600 volunteers registered to help build approximately 65,000 of the 500,000 sandbags to create dikes 20.5 feet (6.2 meters) high to protect the City of Winnipeg, Manitoba in the war against the Red River of the North flood. 700 volunteers answered at the rural municipality of St. Andrews alone. Once sandbags are filled for West St. Paul, St. Andrews, and Selkirk, then frozen culverts must …
		"volunteers helped the war against the Red River of the North flood"
		"Rivers" have banks	has parts	has parts	has parts	has parts	has parts	Prominent Relationship
		In a river flood, its banks overflow	Simultaneous Conditions	Cause and Effect	Functionality	Simultaneous Conditions	Simultaneous Conditions	Definition
	ENTAILMENT	Red River will overflow its banks.
353		The government of Peru declared a state of emergency in the vicinity of the Ubinas volcano on Saturday as it began to spew out ash and smoke over a 6km area, indicating a possible eruption in the near future. The civil defense institute has recommended the total evacuation of the 3,500 residents of the district of Ubinas. The Peruvian military has been ordered to aid in the evacuation of civilian…
		"Peru" is a place	Geography	Geography	Geography	Geography	Geography	Geography
		"The government of Peru declared a state of emergency in the vicinity of the Ubinas volcano"
		The "Ubinas volcano" is in Peru	Geography	Geography	Geography	Geography	Geography	is member of
	ENTAILMENT	The Ubinas volcano is situated in Peru.
355		American singer, Brandy Norwood, known for her role as a judge on America's Got Talent amongst other roles, has been sued for US$50 million by the family of a woman who was killed in a car crash. California Highway Patrol (CHP) said that Brandy, 27, should be charged with a misdemeanor count of vehicular manslaughter for being part of the fatal car crash that killed Awatef Aboudihaj, 38. Aboudiha…
		"..on December 30, 2006.."
		it is December 30, 2006 at this point in the text
		"Aboudihaj died the next evening."
		"the next evening" means that the date is incremented by 1	X	X	X	X	X	X
		30 + 1 = 31	Arithmetic	Arithmetic	Arithmetic	Arithmetic	Arithmetic	Arithmetic
	ENTAILMENT	Awatef Aboudihaj died on December 31, 2006.
357		It is Frank Messina who has personalities as diverse as Joe Benigno, the archetype of the New York sportscaster at WFAN, reflecting on love and poetry. "No one would question a poet writing about love for a woman," said Benigno, "but when you're a fan of a team, the emotional attachment is even stronger...." Benigno sounded similar to avant-garde writer and musician David Amram, who said Messina'…
		"Bowery Poetry Club founder Bob Holman"
		A founder of an organization supports that organization	Support/Opposition	Support/Opposition	Support/Opposition	Support/Opposition	Support/Opposition	Support/Opposition
		A destroyer of an organization is against that organization	Support/Opposition	Support/Opposition	Support/Opposition	Support/Opposition	Support/Opposition	Support/Opposition
	CONTRADICTION	Bowery Poetry Club was destroyed by Bob Holman.
358		Australian treasurer, Peter Costello (Higgins, Liberal) told parliament on Tuesday that the greatest threat to Australia's economy would be for opposition leader Kim Beazley (Brand, Labor) to gain office. Mr Costello said that the Australian economy would suffer with Mr Beazley at the helm. "The greatest threat to the Australian economy domestically would be the election of the Leader of the Oppo…
		"Australian Peter Costello said that the Australian economy.."
		An Australian person supports the Australian economy	Support/Opposition	Support/Opposition	Support/Opposition	Support/Opposition	Support/Opposition	Support/Opposition
		"'The greatest threat to the Australian economy would be Kim Beazley,' said Peter Costello."
		A person does not support a potential threat to something they do support	Support/Opposition	Support/Opposition	Transitivity	Support/Opposition	Support/Opposition	Support/Opposition
	ENTAILMENT	Kim Beazley is not supported by Peter Costello.
364		Trains, trams, cars and buses ground to a halt on Monday after a shoot-out between 18:00 CET and 19:00 CET in the historical city of Basel in Switzerland. The first shots were fired at around 16:00 CET according to the spokesperson of the Government. Special Police Forces were getting prepared to launch an assault against this building. The authors of the shoot-out are unknown as well as their ta…
		"Basel in Switzerland"
		"Switzerland" is in Europe	Geography	Geography	Geography	Geography	Geography	Geography
	ENTAILMENT	Basel is a European city.
369		When Stronach was with the Conservatives she dated fellow MP Peter MacKay. In an interview in the Toronto Star on January 8, 2005, Stronach confirmed that she and MacKay were dating. Stronach, elected as a Conservative in the 2004 election, crossed the floor to the Liberal Party on May 17, 2005. She did not comment on what impact this would have on their relationship. On May 18, 2005, MacKay told…
		"Stronach dated Peter MacKay"
		"Peter MacKay's relationship with Stronach was indeed over"
		To be an ex-girlfriend of someone, one must date them and the relationship must have ended	Precondition	Precondition	Precondition	Precondition	Precondition	Precondition
		"Stronach was previously married to Johann Olav Koss"
	ENTAILMENT	Johann Olav Koss was married to MP Peter MacKay's ex-girlfriend.
372		Mr. Hakeem, 58, left the North-West Frontier Province (NWFP) at the age of 25 and became a naturalized citizen of the U.S. Now a businessman who is active in Texas politics, he shares some views as a person who is in touch with his family and friends who remain in the region. He travelled throughout portions of Pakistan at the end of last year.
		"Mr. Hakeem became a naturalized citizen of the U.S."
		To become a naturalized citizen of somewhere, one must not have been born there	Precondition	Precondition	Precondition	Precondition	Precondition	Precondition
		"Texas" is in the U.S.	Geography	Geography	Geography	Geography	Geography	Geography
	CONTRADICTION	Mr. Hakeem was born in Texas.
374		The South African government has set a six-month deadline for some white farmers to agree on sale prices for their farms. The government will be requiring them to sell the farms as part of its land redistribution programme. Agriculture and Land Affairs Minister Lulu Xingwana said that if no agreement is reached in 6 months, the government could expropriate farmlands. Stating that negotiations hav…
		"The South African government.."
		"Minister Lulu Xingwana"
		a "minister" is part of the government	is member of	is member of	is member of	is member of	is member of	is member of
		Lulu Xingwana is in the "South African government"
	ENTAILMENT	Lulu Xingwana holds offices in the South African government.
379		It was horrible to go in there, SPCA spokesman Matt Stanton said. "Our people had to fill their nostrils with Vick's VapoRub and wear masks. They could only go in for five minutes at a time and had to come out to get fresh air again." Oughton refused to leave the house during the inital investigation and declined to speak to reporters. "Go away. Go away. We have a call in to the police," two wome…
		"SPCA spokesman Matt Stanton"
		a person is employed by one organization	Functionality	Functionality	Functionality	Functionality	Functionality	Mutual Exclusivity
		when an organization pays someone's salary, that person is employed by the organization	Simultaneous Conditions	Simultaneous Conditions	Prominent Relationship	Simultaneous Conditions	Simultaneous Conditions	Prominent Relationship
	CONTRADICTION	Vick's VapoRub pays Matt Stanton's salary.
381		The first design for the Sydney Opera House was created by Utzon in 1957. Mr Utzon left Australia and returned to Denmark in 1966 due to disputes with the NSW government over cost blowouts and design differences. The building was finished 1973. Utzon never returned to Australia to see his building completed. Relations between New South Wales and Utzon improved in the late 1990s and in 1999 the Sy…
		"Sydney Opera House"
		"Sydney" is a place	Geography	Geography	Geography	Geography	Geography	Geography
		"Sydney" is in Australia	Geography	Geography	Geography	Geography	Geography	Geography
	ENTAILMENT	Sydney Opera House is situated in Sydney, Australia.
400		Rico Daniels is a British TV presenter living in France who is known for his two television series - The Salvager - whilst he still lived in the UK and then Le Salvager after he moved to France. Rico has been in a variety of jobs but his passion is now his profession - he turns unwanted 'junk' into unusual pieces of furniture. Rico's creations and the methods used to fabricate them are the subjec…
		"Rico Daniels is living in France"
		people only live in one place	Functionality	Functionality	Functionality	Functionality	Functionality	Mutual Exclusivity
	CONTRADICTION	Rico Daniels lives in Britain.
401		A train driver from the United Kingdom has had his conviction for manslaughter over a head-on rail collision in 1989 quashed. A train operated by Robert Morgan, 64, passed a red signal at Purley and struck an oncoming service on March 4, 1989, killing five and injuring 80 more. Morgan's train had been destined for London Victoria having left Littlehampton, but after passing through the red light …
		"A train operated by Robert Morgan"
		"Robert Morgan" is responsible for the "train"	Accountability	Accountability	Accountability	Accountability	Accountability	Accountability
		"A train passed a red signal, ..killing five"
		"the train" is responsible for "killing five"	Accountability	Accountability	Accountability	Accountability	Accountability	Accountability
		"Robert Morgan" killed "five"	Transitivity	Transitivity	Transitivity	Transitivity	Transitivity	Transitivity
	ENTAILMENT	Robert Morgan killed 5 people.
410		After having a meeting in Bari, Italy, on the 13th of March, the President of Russia, Vladimir Putin, and the Prime Minister of Italy, Romano Prodi, gave a press-conference, summarizing the results of their conversations. The main point the two leaders agreed on was that only diplomatic means should be used in solving such international conflicts as in Afghanistan, Iraq and, especially, Iran with…
		"the President of Russia and the Prime Minister of Italy agreed that only diplomatic means should be used in solving international conflicts"
		"the President of Russia" represents Russia	Synecdoche	Synecdoche	Synecdoche	Synecdoche	Synecdoche	Support/Opposition
		"the Prime Minister of Italy" represents Italy	Synecdoche	Synecdoche	Synecdoche	Synecdoche	Synecdoche	Support/Opposition
	ENTAILMENT	Russia and Italy agree diplomacy is the way to solve international conflicts.
429		The bill on voluntary student unionism, as proposed earlier by the Federal Government education minister Brendan Nelson passed the House of Representatives on December 7 and is now to be debated in the Senate. The Higher Education Support Amendment (Abolition of Compulsory Up-Front Student Union Fees) Bill 2005, commonly known as "voluntary student unionism" or VSU, will have the effect of removi…
		"The bill on voluntary student unionism, as proposed by the Federal Government"
		"The Federal Australian Labor Party Opposition.."
		"Australia" is a country	Geography	Geography	Geography	Geography	Geography	Geography
		countries have governments	has parts	has parts	has parts	has parts	has parts	has parts
		the "Federal Government" is the "Australian Federal Government"
		the "Federal Government" of a country represents that country	Synecdoche	Synecdoche	Synecdoche	Synecdoche	Synecdoche	Synecdoche
	ENTAILMENT	A bill on students' associations is being discussed in Australia.
432		The International Criminal Court (ICC) in The Hague, Netherlands has ordered the arrest of the president of the African country of Sudan, Omar Hassan al-Bashir. The warrant was issued by the ICC for seven charges of crimes against humanity and war crimes, in the Darfur region of the country.
		"the arrest of Al-Bashir"
		in an arrest, a warrant is often issued	Simultaneous Conditions	Omniscience	Cultural/Situational	Prominent Relationship	Simultaneous Conditions	Cause and Effect
		"The warrant was issued for charges of crimes against humanity and war crimes"
		the reason for an arrest is the same as the reason for the warrant issued	X	X	X	X	X	X
		If crimes against Egypt were involved, they would have been mentioned	Omniscience	Omniscience	Omniscience	Omniscience	Omniscience	Omniscience
	CONTRADICTION	Al-Bashir was arrested for crimes against Egypt.
434		Ford Motor Company NYSE: F sales dropped 42% last month from the previous year. General Motors NYSE: GM reported a 49% decline. Chrysler was hardest hit among the domestically owned manufacturers with a plunge of 55%. The decline in sales has not been limited to just US manufacturers. Japanese automaker Toyota NYSE: TM reported a 32% drop in US sales from a year earlier, Nissan MotorsNASDAQ: NSAN…
		"Ford Motor Company sales dropped 42%"
		"Ford Motor Company" is a car manufacturer
		"Chrysler .. with a plunge of 55%"
		"Chrysler" is a car manufacturer
		"Japanese automaker Toyota reported a 32% drop in US sales"
		decline in sales leads to a loss in profit	Cause and Effect	Cause and Effect	Cause and Effect	Cause and Effect	Cause and Effect	Cause and Effect
	ENTAILMENT	Car manufacturers are suffering a loss in profit.
437		The Japanese Nikkei 225 has recorded it's third biggest drop in history with a massive sell-off in the exchange that has resulted in USD 250 billion being knocked of the index's value. Toyota, which is the second largest carmaker in the world, fell by the largest amount in 21 years, while Elpida Memory, the world's largest manufacturer of computer memory, dropped in value to a record low.
		"The Japanese Nikkei 225 has recorded the exchange's third biggest drop in history"
		"Japan" is a country	Geography	Geography	Geography	Geography	Geography	Geography
		A country has an economy	has parts	has parts	has parts	has parts	has parts	has parts
		A country's exchange affects the country's economy	Cause and Effect	Prominent Relationship	Cause and Effect	Cause and Effect	Cause and Effect	Cause and Effect
		"Toyota, which is the second largest carmaker in the world, fell"
		"Toyota" is Japanese	Geography	is member of	Geography	Argument Types	Geography	is member of
		large companies affect their country's economy	Cause and Effect	Accountability	Cause and Effect	Cause and Effect	Cause and Effect	Prominent Relationship
		"Elpida Memory, the world's largest manufacturer of computer memory, dropped"
		"Elpida Memory" is Japanese
		an exchange and large companies affect a country's economy	Probabilistic Dependency	Probabilistic Dependency	Probabilistic Dependency	Probabilistic Dependency	Probabilistic Dependency	Cause and Effect
		flourishing means to be on the rise	Definition	Definition	Definition	Definition	Definition	Definition
	ENTAILMENT	Japan's economy is not flourishing.
438		SANTOS,Brazil - Miss Marina Souza, aged 43, mother of Robson de Souza-known as Robinho (Little Robin)- a Brazilian soccer player for the Santos Football Club has been released Friday, December, 17 by her kidnappers at Santa Cruz Street, in Perus, a district of São Paulo city, after 40 days been captive. She was kidnapped last Saturday, November 6th, in Praia Grande, São Paulo, during a barbecue w…
		"Marina Souza, mother of Robinho"
		A mother of someone cannot also be their sister	Precondition	Simultaneous Conditions	Mutual Exclusivity	Mutual Exclusivity	Definition	Mutual Exclusivity
	CONTRADICTION	Marina Souza is Robinho's sister.
442		Three inmates hung themselves with nooses made from their bedsheets at the U.S. base in Guantanamo Bay, Cuba. According to the U.S. Military, the time of death is not yet clear; the men were "found unresponsive and not breathing in their cells by guards." Two of the men are reported to be Saudi, the third being Yemeni. According to Admiral Harry Harris, one of the prisoners was a mid-to-high leve…
		"Three inmates hung themselves"
		an "inmate" is a person in jail	Definition	Definition	Definition	Definition	Definition	Definition
	ENTAILMENT	Three people committed suicide in jail.
454		On January 11, 2009, an 18-year-old teenager was arrested for writing her nickname, "2shie", on a wall in a café near Hyde Park, Sydney, Australia. After the arrest, the teenager, Cheyene Back, pleaded guilty to intentionally or recklessly damaging property. Cheyene Back had been captured on a closed-circuit security camera at the "Hyde Park Cafe" on Macquarie Street, when she and friends wrote o…
		"a teenager was arrested for writing on a wall"
		to be arrested for something, that thing must be illegal	Precondition	Precondition	Precondition	Precondition	Precondition	Definition
		"writing on a wall" illegaly means graffiti	Definition	Definition	Definition	Definition	Definition	Definition
	ENTAILMENT	A teenager was arrested in Australia for scrawling graffiti on a wall.
457		Sunshine Coast Regional Council has received legal advice that it could not challenge the appeals proccess of McDonald's Australia. Council rejected development plans for a 24 hour store at Minyama in December. "... council has rceived legal advice back that McDonalds will win because of planning laws allow code assessment - the ugly American McDonald will win and run roughshod over residents and…
		"..McDonald's Australia.."
		"Sunshine Coast Regional Council rejected development plans for a store"
		"McDonald's" is comprised of stores	has parts	has parts	has parts	has parts	has parts	has parts
	CONTRADICTION	Sunshine Coast Regional Council accepted McDonald's Australia development plans.
458		The Department of Internal Affairs and the Internal Affairs minister, Rick Barker, also received a lot of support for a change, including from the Federated Farmers. Farmers had usually opposed a change to the daylight saving period because it hampered with operations. Helen Clark, the Prime Minister of New Zealand, stated that she personally did not support a change to the start of daylight savi…
		"the Prime Minister of New Zealand stated .. a change to daylight saving"
		"New Zealand" is a country	Geography	Geography	Geography	Geography	Geography	Geography
		"the Prime Minister of New Zealand" represents "New Zealand"	Synecdoche	Synecdoche	Geography	Synecdoche	Synecdoche	Synecdoche
		"the start of the daylight saving period was altered"
		a country is in control of its daylight saving period	Accountability	Accountability	Functionality	Argument Types	Accountability	Omniscience
	ENTAILMENT	New Zealand changed the daylight saving period.
460		India is seeking extradition, but the fact that Nepalese authorities have added their own charges of illegal organ transplants in on top of the foreign currency possession charges, could delay proceedings. Meanwhile, Poonam Kumar, who is Amit Kumar's wife and lives in Brampton, Canada with their two sons, claims that "My husband is innocent... You tell me what human would want to do these things …
		"Nepalese authorities have added their own charges on top of the foreign currency possession charges"
		"Nepal" is a country	Geography	Geography	Geography	Geography	Geography	Geography
		countries have laws	has parts	has parts	has parts	has parts	has parts	has parts
		laws exist where charges exist	Simultaneous Conditions	Simultaneous Conditions	Simultaneous Conditions	Simultaneous Conditions	Simultaneous Conditions	Prominent Relationship
		"Nepal" has laws
		"Nepalese authorities" represent Nepal	Synecdoche	Synecdoche	Synecdoche	Synecdoche	Synecdoche	Support/Opposition
		a country is in control of its charges	Accountability	Accountability	Functionality	Argument Types	Accountability	Probabilistic Dependency
	ENTAILMENT	Nepal has laws about foreign currency.
463		A 300 million-year-old fossilized rain forest has been found, in its entirety, outside Georgetown, Illinois, United States. Coal miners called in scientists to look at a vast and dense seam of fossils they found in a mine. It is the largest fossilized forest ever to be found. It is about the size of San Francisco, California or 10,000 hectares [10 km by 10 km] and is said to be the first rain for…
		"A fossilized forest has been found in the United States"
		"forests" have trees	has parts	has parts	has parts	has parts	has parts	has parts
	ENTAILMENT	Fossilized trees have been found in the USA.
471		Greenpeace activist Adele blogged the news from their Stockholm office expressing reservations over the legitimacy of the vote saying it would "change little or nothing" as previous votes had already been passed in favour of the anti-whaling group of countries. Mike Townsley from Greenpeace International said, "Greenpeace is disgusted that any member of the IWC would seek to promote whaling based…
		"Greenpeace wants to protect whales."	Support/Opposition	Support/Opposition	Probabilistic Dependency	Argument Types	Public Entities	Support/Opposition
	ENTAILMENT	Greenpeace wants to protect whales.
474		Program coordinators estimate that tutors volunteered some 5000 hours last year. City Manager Jennifer Sparacino estimates, "That's worth about $100,000 per year in volunteer time." Learners also spoke about what Read Santa Clara meant to them. Raymond Moreno said, "I hope it stays for another ten, twenty, thirty years, because we need it." Juan Velasquez said, "My life has changed a lot...I did …
		"Learners spoke about Read Santa Clara"
		If learners are involved in a program, it is a learning program	Prominent Relationship	Probabilistic Dependency	Prominent Relationship	Prominent Relationship	Prominent Relationship	Transitivity
		reading causes learning	Cause and Effect	Cause and Effect	Cause and Effect	Cause and Effect	Cause and Effect	Cause and Effect
	ENTAILMENT	Read Santa Clara is a learning program.
478		On 31 October 2007 the National Court in Madrid issued a decision recognizing that the National Church of Scientology of Spain should be entered in the Registry of Religious Entities. The administrative tribunal of Madrid's High Court ruled that a 2005 justice ministry decision to scrap the church from the register was "against the law." Responding to a petition filed by the church, the ruling sa…
		"the National Court in Madrid recognizes that the National Church of Scientology of Spain should be entered in the Registry of Religious Entities"
		"Madrid" is the capitol of Spain	Geography	Geography	Geography	Geography	Geography	Geography
		"the National Court" represents a country	Synecdoche	Synecdoche	Synecdoche	Synecdoche	Synecdoche	Support/Opposition
		for an organization to be in the Registry of something, the organization must be that something	Precondition	Precondition	Prominent Relationship	Precondition	Precondition	is member of
	ENTAILMENT	The Church of Scientology is a recognised religious entity in Spain.
481		Queensland National Senator Barnaby Joyce, who met with the 43 refugees on Christmas Island, said they appear to have a genuine asylum claim and had been persecuted because of their Christian beliefs. "There are documented cases of members within their families being shot," he said. "There's certainly on the record experiences of them being jailed and tortured so I think they would be under risk …
		"Queensland National Senator Barnaby Joyce"
		"Queensland" is in Australia	Geography	Geography	Geography	Geography	Geography	Geography
	ENTAILMENT	Mr. Joyce is an Australian Senator.
485		On Halloween night, October 31, during a 2-hour long live episode of NBC show Phenomenon, famed magician Criss Angel told Uri Geller and Jim Callahan, "I will give you a million dollars of my personal money right now if either one of you can tell me specific details of what's in [this envelope] right now." While Geller ignored Angel's challenge, Callahan started to confront Angel in a hostile man…
		"Criss Angel told Jim Callahan, 'I will give you a million dollars of my personal money right now if either one of you can tell me specific details of what's in [this envelope] right now.'"
		one defition of challenging someone is to give them a task for a reward	Definition	Probabilistic Dependency	Definition	Definition	Definition	Definition
		"tell me specific details of what's in [this envelope] right now" is a task
		"a million dollars" is a reward
	ENTAILMENT	Criss Angel is a magician who challenged Jim Callahan.
492		The closure of a mathematics summer camp in Sirince, Izmir, Turkey by Turkish authorities has drawn scorn from scientists around the world. Professor Alexandre Borovik, who organized some of the opposition, said "We are shocked to learn that the Summer School of Mathematics initiated by Professor Ali Nesin was shut down by local authorities. We found it surprising that such an esteemed mathematic…
		"The closure of a mathematics summer camp by Turkish authorities"
		"Turkish authorities" represent Turkey	Synecdoche	Synecdoche	Synecdoche	Synecdoche	Synecdoche	Synecdoche
	ENTAILMENT	Turkey closed a mathematics summer camp.
493		Cathal Ryan, an early board member of Irish non-designated flag carrier, and son of late co-founder Tony Ryan, has died. He was 48, and had been diagnosed with cancer. Cathal became one of Ryanair's first pilots, having trained as one in the 1980s in Sri Lanka, when his father set up the airline in 1985 in trust for his three sons, of which Cathal was the eldest. He left the Far East specifically…
		"Cathal Ryan, son of Tony Ryan"
		a person can only have one father	Functionality	Functionality	Functionality	Functionality	Functionality	Simultaneous Conditions
	CONTRADICTION	Garreth Ryan was Cathal's father.
498		Police officers and officials at an emergency meeting have voted to ballot every United Kingdom police officer over the right to strike. They also called for the home secretary, Jacqui Smith, to resign over the current dispute and further passed a vote of no confidence in the home secretary's ability to deal with pay and conditions.
		"Police officers passed a vote of no confidence in Jacqui Smith's ability"
		"Jacqui Smith's ability" represents "Jacqui Smith"	Synecdoche	Synecdoche	Synecdoche	Synecdoche	Synecdoche	Prominent Relationship
		to "pass a vote of no confidence" of a person means that person is not trusted	Definition	Support/Opposition	Support/Opposition	Definition	Definition	Definition
	CONTRADICTION	Police officers in England trust Jacqui Smith.
499		Russian President Vladimir Putin said he will accept a nomination for Prime Minister of Russia, as Dmitry Medvedev has suggested he will do, if he wins the presidential election. Meanwhile, the United Russia ruling party, which is backed by Putin, officially nominated Medvedev for presidency today. The intention was declared on December 10, being the long-awaited answer to the question on "Putin'…
		"the United Russia ruling party nominated Medvedev for presidency"
		"the United Russia ruling party" supports "Mendvedev"	Support/Opposition	Support/Opposition	Support/Opposition	Support/Opposition	Support/Opposition	Support/Opposition
		"the United Russia ruling party is backed by Vladimir Putin"
		"Vladimir Putin" supports "the United Russia ruling party"	Support/Opposition	Support/Opposition	Support/Opposition	Support/Opposition	Support/Opposition	Support/Opposition
		"Vladimir Putin" supports "Mendvedev"	Transitivity	Support/Opposition	Transitivity	Transitivity	Transitivity	Support/Opposition
	CONTRADICTION	Vladimir Putin does not support Medvedev.
502		A mathematical summer school in Turkey run by mathematics professor Ali Nesin has been closed by the authorities apparently for "teaching without a permit" and "founding an illegal institution". The attention of the international scientific community was attracted to this action on the blog of a mathematics professor at Manchester. Alexandre Borovik's "Mathematics under the microscope" blog had p…
		"A mathematical summer school in Turkey has been closed by the authorities"
		"the authorties" represent a country	Synecdoche	Synecdoche	Synecdoche	Synecdoche	Synecdoche	Synecdoche
		in this case, the country is "Turkey"	Geography	Probabilistic Dependency	Transitivity	Geography	Geography	Geography
	ENTAILMENT	Turkey closed a mathematics summer camp.
503		In a written statement ABC Radio Networks president Jim Robinson said "Paul Harvey was one of the most gifted and beloved broadcasters in our nation's history. As he delivered the news each day with his own unique style and commentary, his voice became a trusted friend in American households." Former president George W. Bush in a statement condoled Harvey's death by saying "Laura and I are sadden…
		"'Paul Harvey was one of the most gifted and beloved broadcasters in America's history'"
		"America" is a country	Geography	Geography	Geography	Geography	Geography	Geography
		"Paul Harvey" is American	is member of	Probabilistic Dependency	is member of	Argument Types	Geography	is member of
	ENTAILMENT	Paul Harvey was an American broadcaster.
506		Seven miners have been killed and seven more are missing after a coal mine flooded in north China's Hebei province. The Xinhua news agency reports the latest coal mine disaster occurred around 5:00 a.m. on Saturday in Xingtai City.A reason for the accident has not yet been given. Owners of the coal mine have been detained by local police and the investigation into the cause of the flooding is und…
		"Seven miners have been killed after a coal mine flooded in north China's Hebei province"
		7 < 73	Arithmetic	Arithmetic	Arithmetic	Arithmetic	Arithmetic	Arithmetic
		"China" is a place	Geography	Geography	Geography	Geography	Geography	Geography
		a "flooding" is an accident
	CONTRADICTION	A coal mine accident killed more than 73 people in China.
514		An appeals court in Eastern France has confirmed the Swedish car manufacturer Volvo is guilty over the deaths of two schoolchildren aged nine and ten and the serious injury of a third after a brakes failure caused an accident in 1999. The Volvo 850 TDI was being driven by a local teacher when it struck the children, who had been on their way to school. Driver Catherine Kohtz later asserted that t…
		"Swedish car manufacturer Volvo"
		"Sweden" is a place	Geography	Geography	Geography	Geography	Geography	Geography
		a manufacturer only comes from one place	Functionality	Functionality	Functionality	Functionality	Functionality	Mutual Exclusivity
	CONTRADICTION	Volvo is a car manufacturer from Finland.
520		The police have cordoned off roads around Upper Woburn Place following a massive explosion on a bus in the vicinity. Traffic is at a standstill in many places in the capital. Defra's security branch are reporting that police are advising everyone in London not to use any public transport and the Cabinet Office are advising staff to remain in offices until further notice. A further email sent to a…
		"..everyone in London.."
		"Charing Cross railway station"
		cities can have railway stations	has parts	Cultural/Situational	has parts	has parts	has parts	has parts
		"Charing Cross" is in "London"	Geography	Geography	Geography	Geography	Geography	Geography
	ENTAILMENT	Charing Cross is in London.
527		At least 28 people drowned and were confirmed dead, 46 were rescued, while 34 others remain missing on Sunday, after an overcrowded passenger motorboat capsized off waters in Ballesteros, a town of 17,000 people, the Cagayan police reported. 'M/B Mae Jan', a wooden-hulled ferry, was carrying 102 passengers, after an eight-hour voyage from Calayan Island in the Luzon Strait for Appari when it caps…
		"a ferry carrying 102 passangers capsized"
		a "ferry" has passengers and crew	has parts	has parts	has parts	has parts	has parts	has parts
		on a ferry, there are less crew members than passengers	Simultaneous Conditions	Cultural/Situational	Cultural/Situational	Simultaneous Conditions	Simultaneous Conditions	has parts
		102 * 2 = 204	Arithmetic	Arithmetic	Arithmetic	Arithmetic	Arithmetic	Arithmetic
		other vehicles or people involved would have been mentioned	Omniscience	Omniscience	Omniscience	Omniscience	Omniscience	Omniscience
		a maximum of 204 people could have died in the ferryboat accident
		204 people < 800 people	Arithmetic	Arithmetic	Arithmetic	Arithmetic	Arithmetic	Arithmetic
		"Appari" (or "the Cagayan River" or "Pallog village") is in the Philippines	Geography	Geography	Geography	Geography	Geography	Geography
	CONTRADICTION	More than 800 people died in a ferryboat accident in the Philippines.
539		The Canadian Conservative Party plans to reject the federal budget. A recently amended provision allowing the government to control greenhouse gas emissions is "completely unacceptable," says its leader Stephen Harper. Harper said Thursday his party plans to vote against the omnibus budget bill if it includes the amendment to the Canadian Environmental Protection Act. It would add greenhouse gas …
		"Mr. Harper said his Canadian Conservative Party plans to vote against the budget bill"
		"Canada" is a place	Geography	Geography	Geography	Geography	Geography	Geography
	CONTRADICTION	In Canada Mr. Harper and his party will support the budget bill.
542		Cardinal Murphy-O'Connor said, "I am very glad to welcome Tony Blair into the Catholic Church ... For a long time he has been a regular worshipper at Mass with his family and in recent months he has been following a programme of formation to prepare for his reception into full communion ... My prayers are with him, his wife and family at this joyful moment in their journey of faith together."
		"'..welcome Tony Blair into the Catholic Church..'"
		when a person is welcomed into an organization, they belong to that organization	Cause and Effect	Argument Types	Cause and Effect	Simultaneous Conditions	Cause and Effect	Support/Opposition
		a person only belongs to one church	Functionality	Functionality	Functionality	Functionality	Functionality	Mutual Exclusivity
	CONTRADICTION	Blair belongs to the Church of England.
549		"Three detainees in Villawood remain on voluntary starvation," an immigration department spokesman said. "Two Villawood detainees have agreed to stop their hunger strike. Australian refugee advocates say they are concerned about the welfare of the Chinese men, who have been on a hunger strike since October 20 at Sydney's Villawood Immigration Detention Centre. Three of the six men from mainland C…
		"Detainees in Villawood remain on voluntary starvation"
		"voluntary starvation" means refusing food	Definition	Definition	Definition	Definition	Definition	Definition
		"Sydney's Villawood Immigration Detention Centre"
		"Sydney" is a place in Australia	Geography	Geography	Geography	Geography	Geography	Geography
	ENTAILMENT	Detainees in Australia are refusing food.
555		Former United States football player O.J. Simpson was sentenced to prison for 15 years yesterday morning, on charges of kidnapping and armed robbery of two sports memorabilia dealers at a hotel in Las Vegas, Nevada. Simpson's accomplice in the crime, one Clarence Stewart, was also given a thirty-three year sentence. Both will be eligible for parole in five years. Simpson, aged 61, was arrested on…
		"O.J. Simpson was sentenced to prison"
		If "O.J. Simpson" was released, it would have been stated	Omniscience	Omniscience	Omniscience	Omniscience	Omniscience	Omniscience
	CONTRADICTION	O.J. Simpson was released in Las Vegas.
556		Djibouti and Eritrea have spoken to the United Nations security council on Thursday to discuss a border dispute. Djibouti has said that unless the UN intervenes there will be war. The dispute dates back to June when violence erupted between the nations in the border region of Doumeira. The resulting clashes killed an estimated 35 people. The unmarked border remains disputed, and the nations have …
		"Djibouti and Eritrea have spoken to the United Nations security council on Thursday to discuss a border dispute"
		a "dispute" between entities can lead to war between those entities	Cause and Effect	Cause and Effect	Cultural/Situational	Cause and Effect	Cause and Effect	Cause and Effect
		"Djibouti has said that unless the UN intervenes there will be war"
	ENTAILMENT	There may be a war between Djibouti and Eritrea.
557		A Japanese whaling ship, the Keiko Maru, will be docking in Hobart on December 24 to transfer a sick crew member to hospital. The crew member is suffering from appendicitis. Greenpeace has called on the Australian government to prevent the ship from refuelling. The government stated it is opposed to commercial whaling, but that taking such action would be "counter-productive". Greenpeace CEO Stev…
		"Greenpeace wants to protect whales."	Probabilistic Dependency	Probabilistic Dependency	Probabilistic Dependency	Argument Types	Public Entities	Support/Opposition
	ENTAILMENT	Greenpeace wants to protect whales.
563		The actress was crowned winner of Celebrity Big Brother, following confrontations with fellow housemates Jade Goody, Jo O'Meara and Danielle Lloyd who were accused of bullying and racism. Despite denying the claims, all three lost most of their major endorsements and Jade and Danielle's partners are said to have left them. Politicians became embroiled in the proceedings when media regulator Ofcom…
		"The actress in Celebrity Big Brother, had housemates Jade Goody,.."
		in "Big Brother," contestants live together	Prominent Relationship	Prominent Relationship	Cultural/Situational	Prominent Relationship	Cultural/Situational	Prominent Relationship
	ENTAILMENT	Jade Goody is a contestant in Celebrity Big Brother.
566		Mr. P V Narasimha Rao, former prime minister of India, passed away this morning after suffering cardiac arrest in a private hospital in New Delhi. He had been in critical condition for the past few days. He was admitted to the All India Institute of Medical Sciences (AIIMS) on December 9 after he complained of breathlessnes.
		"Mr. Rao passed away after suffering cardiac arrest"
		If Mr. Rao had other life threatening illnesses, they would have been mentioned	Omniscience	Omniscience	Omniscience	Omniscience	Omniscience	Omniscience
	CONTRADICTION	Mr. Rao had cancer.
570		Two court filings in response to a lawsuit brought by Nebraska State Senator Ernie Chambers were filed on behalf of God, according to John Friend, clerk of the Douglas County District Court in Omaha, Nebraska. "This one miraculously appeared on the counter. It just all of a sudden was here — poof!" said Mr. Friend. In one filing, St. Michael the Archangel is listed as a witness.
		"Two court filings in response to a lawsuit brought by Senator Ernie Chambers were filed on behalf of God"
		if someone "brings a lawsuit," that means they "sue"	Definition	Definition	Definition	Definition	Definition	Definition
		in a lawsuit, court filings are filed on behalf of the person sued	Prominent Relationship	Functionality	Cultural/Situational	Simultaneous Conditions	Prominent Relationship	Probabilistic Dependency
	ENTAILMENT	Senator Ernie Chambers has sued God.
571		Russia has made delivery of its first shipment of nuclear fuel to Iran's Bushehr facility, which is also being built by Russia. Both the Kremlin and the White House say that this should allow Iran to shut down its controversial uranium enrichment program. The Russian company, Atomstroiexport, said that the shipments began on Sunday. It was also confirmed by Gholam Reza Aghazadeh, the head of the …
		"Russia has made delivery of nuclear fuel to Iran's Bushehr facility"
		"Iran" is a place	Geography	Geography	Geography	Geography	Geography	Geography
		a delivery to a place causes the place to receive what is delivered	Cause and Effect	Cause and Effect	Cause and Effect	Cause and Effect	Simultaneous Conditions	Cause and Effect
	ENTAILMENT	Iran received nuclear fuel from Russia.
575		A Russian journalist, Anna Politkovskaya, who received wide acclaim and prominence for her critical coverage of the Chechen war and opposition to the Putin administration, was found shot dead at her apartment building in Moscow today. Coincidentally, October 7 is the birthday of Russian President Vladimir Putin. Anna Politkovskaya worked for the Novaya Gazeta newspaper. She rose to fame for her c…
		"Anna Politkovskaya was found shot dead"
		in a shooting, someone is responsible	Accountability	Accountability	Accountability	Accountability	Accountability	Accountability
		if someone is responsible for the death of a person, that person is said to have been killed	Definition	Definition	Cause and Effect	Prominent Relationship	Definition	Definition
	ENTAILMENT	Politkovskaya was killed.
600		A Helios airliner (Boeing 737, flight HCY 522) with 115 passengers and 6 crew onboard has crashed into a mountain at 09:04 UTC (12:04 p.m. EEST) near Grammatiko, 40 kilometres (25 miles) north of Athens, while approaching the capital's airport. All on board perished. The plane was travelling from Larnaca, in the southeast of Cyprus (Greek:Kypros) and scheduled to arrive in Prague after a stop in …
		"An airliner with 115 passengers and 6 crew onboard has crashed"
		"All on board perished"
		115 passangers + 6 crew = 121 people	Arithmetic	Arithmetic	Arithmetic	Arithmetic	Arithmetic	Arithmetic
		121 people != 26 people	Arithmetic	Arithmetic	Arithmetic	Arithmetic	Arithmetic	Arithmetic
